# Supplementary material for: Polycythemia Vera and Essential Thrombocythemia Patients Exhibit Unique Serum Metabolic Profiles Compared to Healthy Individuals and Secondary Thrombocytosis Patients
Source: PubMed Central journal article supplement (PMC7865636; doi:10.3390/cancers13030482), 2021-01-27
Supplement: cancers-13-00482-s001.pdf [file cancers-13-00482-s001.pdf]

# Supplementary Materials: Polycythemia Vera and Essential Thrombocythemia patients exhibit unique serum metabolic profiles compared to healthy individuals and secondary thrombocytosis patients

Nuria Gómez-Cebrián, Ayelén Rojas-Benedicto, Arturo Albors-Vaquer, Carlos Besses, Beatriz Bellosillo, Joaquín Martínez-López, Antonio Pineda-Lucena and Leonor Puchades-Carrasco

**Table S1.** Clinical details available for the MPN patients included in the study.

| Clinical Features                                   | ET                  | PV                 |
|-----------------------------------------------------|---------------------|--------------------|
| Hypertension, n (%)                                 | 17 (37%)            | 14 (63.7%)         |
| High LDH levels, n (%)                              | 3 (6.52%)           | 1 (4.54%)          |
| Hemoglobin levels (g/dL; mean $\pm$ sd)             | 14.59 $\pm$ 1.31    | 17.47 $\pm$ 2.16   |
| Leucocyte levels ( $\times 10^9/L$ ; mean $\pm$ sd) | 8.62 $\pm$ 2.09     | 9.45 $\pm$ 3.08    |
| Platelets levels ( $\times 10^9/L$ ; mean $\pm$ sd) | 718.86 $\pm$ 277.92 | 504.3 $\pm$ 175.28 |
| Treatment, n (%):                                   |                     |                    |
| • Hydroxyurea                                       | 29 (63.04%)         | 18 (81.81%)        |
| • Acetylsalicylic acid                              | 15 (32.61%)         | 4 (18.2%)          |
| • Phlebotomy                                        | 2 (4.35%)           | 1 (4.54%)          |
| • Interferon alpha                                  | 1 (2.17%)           | -                  |
| • Any                                               | 13 (28.26%)         | 3 (13.63%)         |
| Thrombotic events, n (%)                            |                     |                    |
| • Before diagnosis                                  | 5 (10.87%)          | 5 (22.72%)         |
| • At diagnosis                                      | 4 (8.67%)           | 1 (4.54%)          |
| • After diagnosis                                   | 3 (6.52%)           | 2 (9.10%)          |
| Other neoplasia, n (%)                              | 5 (10.87%)          | 2 (9.10%)          |

ET: essential thrombocythemia, LDH: lactate dehydrogenase, n: number of patients, PV: polycythemia vera, sd: standard deviation.

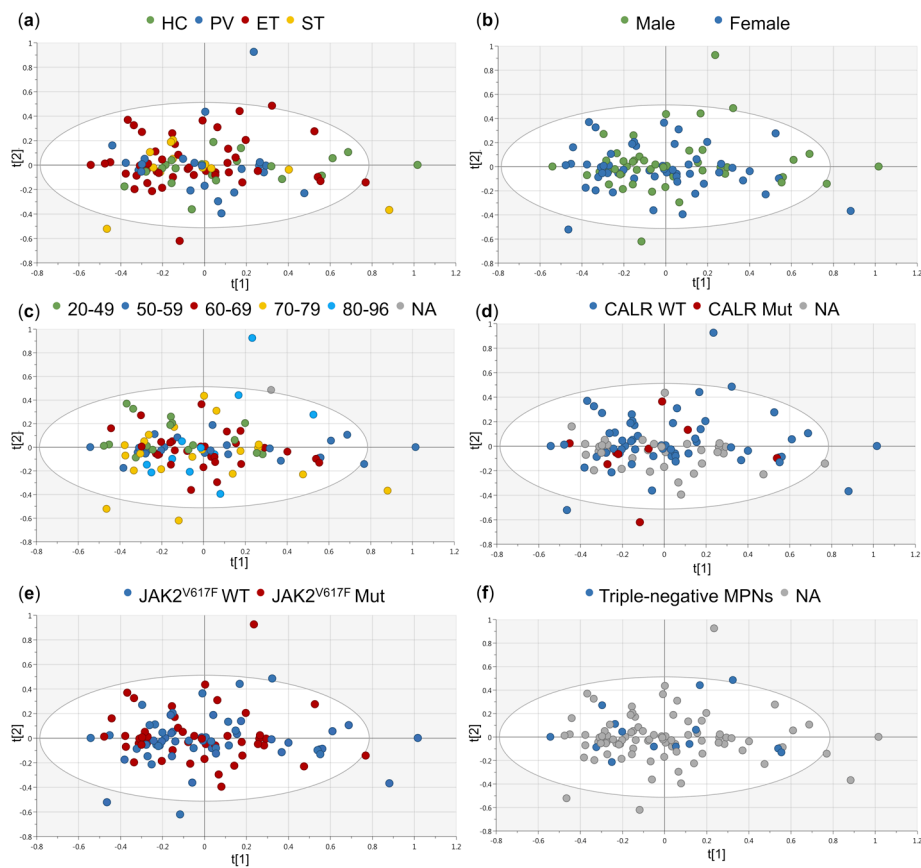

**Figure S1.** Principal Component Analysis (PCA) score plots corresponding to the samples included in the study. Samples are classified according to: (a) group of study, (b) gender, (c) age, (d) CALR, (e) JAK2V617F, and (f) mutational status. ET: essential thrombocythemia, HC: healthy controls, NA: not available, PV: polycythemia vera, ST: secondary thrombocythemia, Mut: Mutant, WT: Wild Type.

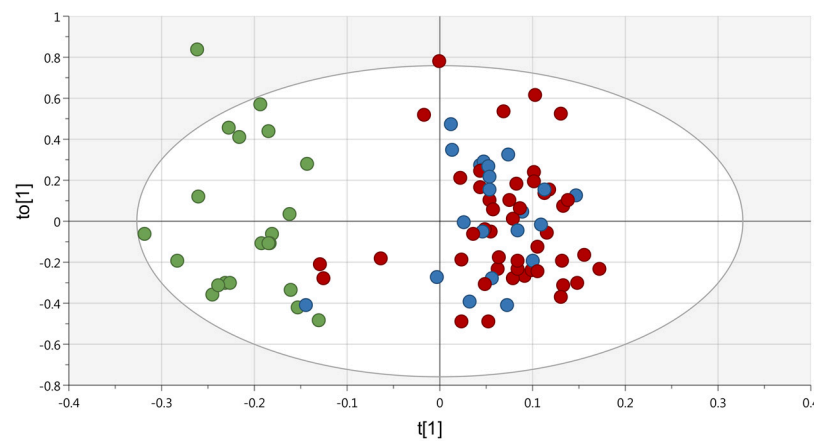

**Figure S2.** OPLS-DA scores plot for the comparison between HC (●) vs ET (●) + PV (●):  $R^2Y = 0.798$ ,  $Q^2Y = 0.701$ . ET: essential thrombocythemia, HC: healthy controls, PV: polycythemia vera.

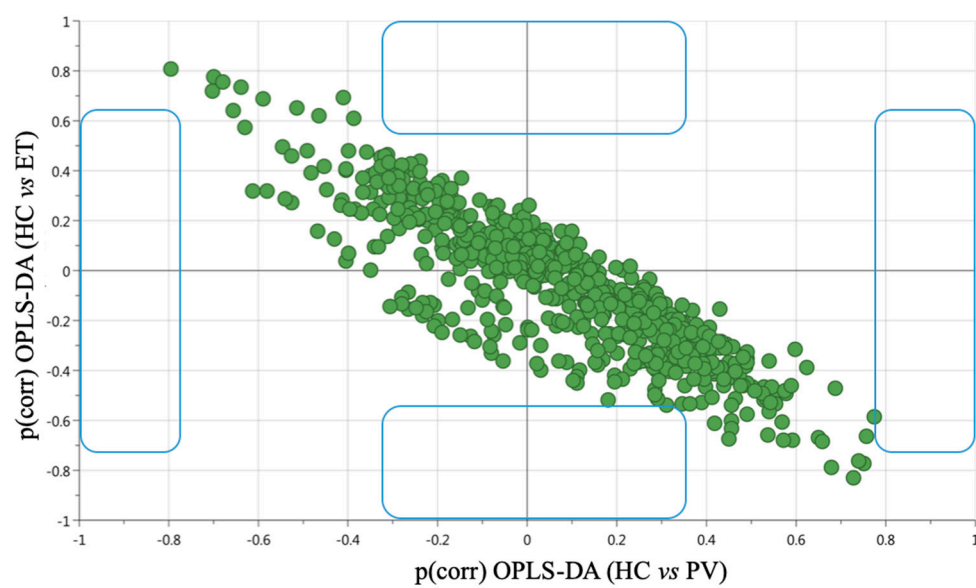

**Figure S3.** SUS-plot analysis correlating the OPLS-DA models of HC vs PV (x-axis) and HC vs ET (y-axis). Metabolic features that are equally important in both models are represented in the diagonal, while the blue rectangular frames represent unique metabolites in each model.
